# Supplementary material for: Dual-Acting Small Molecules: Subtype-Selective Cannabinoid Receptor 2 Agonist/Butyrylcholinesterase Inhibitor Hybrids Show Neuroprotection in an Alzheimer’s Disease Mouse Model
Source: PubMed Central journal article supplement — J Med Chem. 2023 Apr 26;66(9):6414–35. doi: 10.1021/acs.jmedchem.3c00541 (PMC10184129; doi:10.1021/acs.jmedchem.3c00541), 2023-04-26
Supplement: jm3c00541_si_001.pdf [file jm3c00541_si_001.pdf]

## Supporting Information

### Dual-Acting Small Molecules: Subtype-Selective Cannabinoid Receptor 2 Agonist/Butyrylcholinesterase Inhibitor Hybrids Show Neuroprotection in an Alzheimer's Disease Mouse Model

Philipp Spatz<sup>†</sup>, Sophie A. M. Steinmüller<sup>†</sup>, Anna Tutov<sup>†</sup>, Eleonora Poeta<sup>§</sup>, Axelle Morilleau<sup>‡</sup>, Allison Carles<sup>‡</sup>, Marie H. Deventer<sup>°</sup>, Julian Hofmann<sup>†</sup>, Christophe P. Stove<sup>°</sup>, Barbara Monti<sup>§</sup>, Tangui Maurice<sup>\*‡</sup>, Michael Decker<sup>\*†</sup>

<sup>†</sup> Pharmaceutical and Medicinal Chemistry, Institute of Pharmacy and Food Chemistry, Julius Maximilians University Würzburg, Am Hubland, D-97074, Germany

<sup>‡</sup> INSERM UMR-S1198, University of Montpellier, Place Eugène Bataillon, F-34095, France

<sup>§</sup> Department of Pharmacy and Biotechnology, University of Bologna, Via Belmeloro 6, 40126 Bologna, Italy

<sup>°</sup> Laboratory of Toxicology, Department of Bioanalysis, Faculty of Pharmaceutical Sciences, Ghent University, Ottergemsesteenweg 460, 9000 Ghent, Belgium

Corresponding author

\* Michael Decker: E-mail: [michael.decker@uni-wuerzburg.de](mailto:michael.decker@uni-wuerzburg.de)

\* Tangui Maurice: E-mail: [tangui.maurice@umontpellier.fr](mailto:tangui.maurice@umontpellier.fr)

## Contents

|                                                                                            |     |
|--------------------------------------------------------------------------------------------|-----|
| 1. Calculation of combination index.....                                                   | S2  |
| 2. Neuroprotection and Neurotoxicity of compounds <b>14</b> and <b>15d</b> .....           | S3  |
| 3. Time-dependent inhibition of <i>h</i> BChE by compounds <b>15d</b> and <b>21d</b> ..... | S3  |
| 4. $\beta$ arr2 screening of the complete library.....                                     | S4  |
| 5. Pharmacokinetic measurements.....                                                       | S4  |
| 6. HPLC chromatograms of target compounds.....                                             | S9  |
| 7. Melting point measurement.....                                                          | S14 |

## 1. Calculation of the combination index

Table S-1. Calculation of combination index (CI) for the **2 + 6** mix.

| <i>Treatment (mg/kg IP)</i>                  | <i>PP (%)</i>             | <i>C<sub>x,UW-MD-95</sub></i> | <i>C<sub>x,UW-MD-131</sub></i> | <i>CI</i>          |
|----------------------------------------------|---------------------------|-------------------------------|--------------------------------|--------------------|
| <i>(a) Spontaneous alternation (Fig. 8A)</i> |                           |                               |                                |                    |
| <b>2</b> (0)                                 | 0.0 ± 11.2                |                               |                                |                    |
| <b>2</b> (0.1)                               | 51.3 ± 14.2               |                               |                                |                    |
| <b>2</b> (0.3)                               | 65.3 ± 14.8 <sup>1</sup>  |                               |                                |                    |
| <b>6</b> (0)                                 | 0.0 ± 11.2                |                               |                                |                    |
| <b>6</b> (0.1)                               | 45.6 ± 15.7               |                               |                                |                    |
| <b>6</b> (0.3)                               | 51.3 ± 24.3 <sup>2</sup>  |                               |                                |                    |
| <b>2</b> (0.1) + <b>6</b> (0.1)              | 82.9 ± 12.2               | 0.36 ± 0.05                   | 0.47 ± 0.08                    | <b>0.49 ± 0.08</b> |
| <i>(b) Passive avoidance (Fig. 8C)</i>       |                           |                               |                                |                    |
| <b>2</b> (0)                                 | 0.0 ± 34.9                |                               |                                |                    |
| <b>2</b> (0.1)                               | 11.6 ± 38.1               |                               |                                |                    |
| <b>2</b> (0.3)                               | 32.5 ± 33.9               |                               |                                |                    |
| <b>2</b> (1)                                 | 104.5 ± 51.6 <sup>3</sup> |                               |                                |                    |
| <b>6</b> (0)                                 | 0.0 ± 34.9                |                               |                                |                    |
| <b>6</b> (0.1)                               | 20.7 ± 31.8               |                               |                                |                    |
| <b>6</b> (0.3)                               | 80.1 ± 39.3 <sup>4</sup>  |                               |                                |                    |
| <b>2</b> (0.1) + <b>6</b> (0.1)              | 56.0 ± 37.0               | 0.54 ± 0.21                   | 0.22 ± 0.08                    | <b>0.65 ± 0.25</b> |

Percent protection (PP) was calculated using 100% for V1/V2-treated animals and 0% for Aβ<sub>25-35</sub>/V2/V2-treated animals. CI: combination index. C<sub>x,Drug</sub> was calculated using the linear regression from responses with the drug alone: <sup>1</sup> y = 196.4x + 12.68; <sup>2</sup> y = 150.7x + 12.217; <sup>3</sup> y = 103.9x + 0.314; <sup>4</sup> y = 271.2x - 2.56. CI in bold shows synergy.

## 2. Neuroprotection and Neurotoxicity of compounds **14** and **15d**

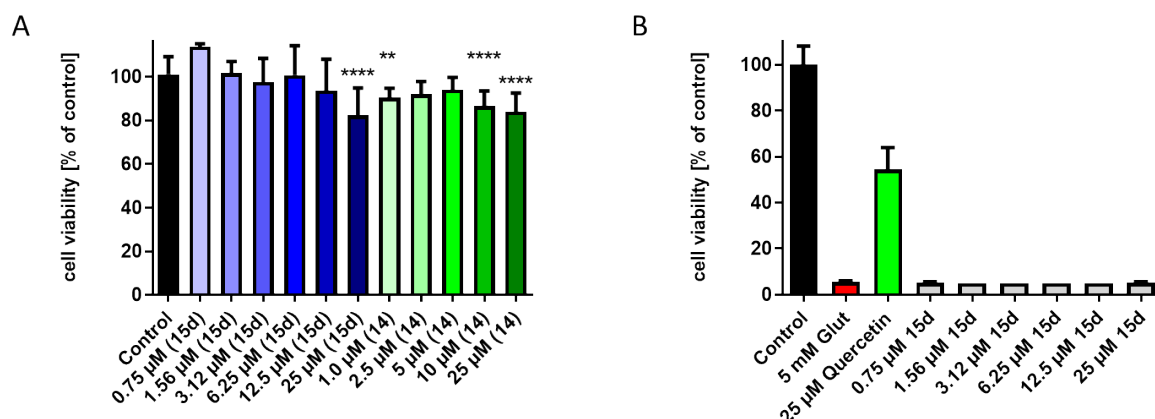

Figure S-1. Neurotoxicity studies on neuronal HT-22 cells for compounds **15d** and **14** (A) and neuroprotection against glutamate-induced oxidative stress of compound **15d** (B). Results of the modified MTT test are presented as means  $\pm$  SD of three independent experiments, each performed in sextuplicate, and refer to untreated control cells, which were set as 100% values. Statistical analysis was achieved by applying one-way ANOVA followed by Dunnett's multiple comparison post-test. Levels of significance: \*\*  $p < 0.01$ ; \*\*\*\*  $p < 0.0001$ . Treated cells were compared to (A) untreated cells and (B) cells treated with glutamate only.

## 3. Time-dependent inhibition of hBChE by compounds **15d** and **21d**

To determine  $K_m$  and  $v_{max}$ , residual enzyme activity was plotted against time for several concentrations.

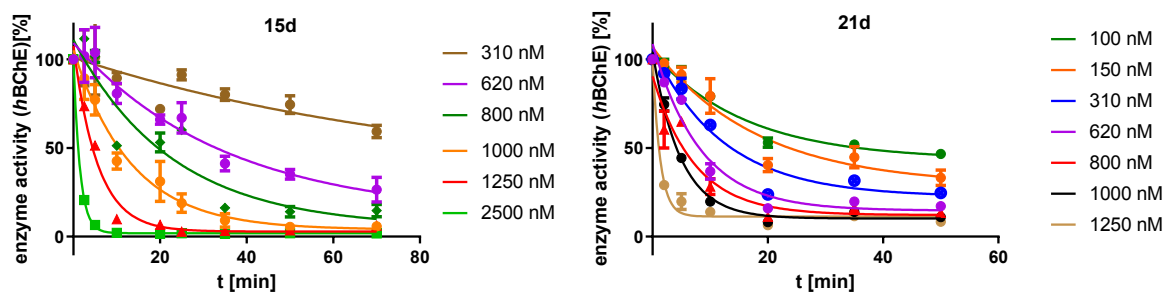

Figure S-2. Time-dependent inhibition of hBChE by compounds **15d** and **21d**.

#### 4. $\beta$ arr2 screening of the complete library

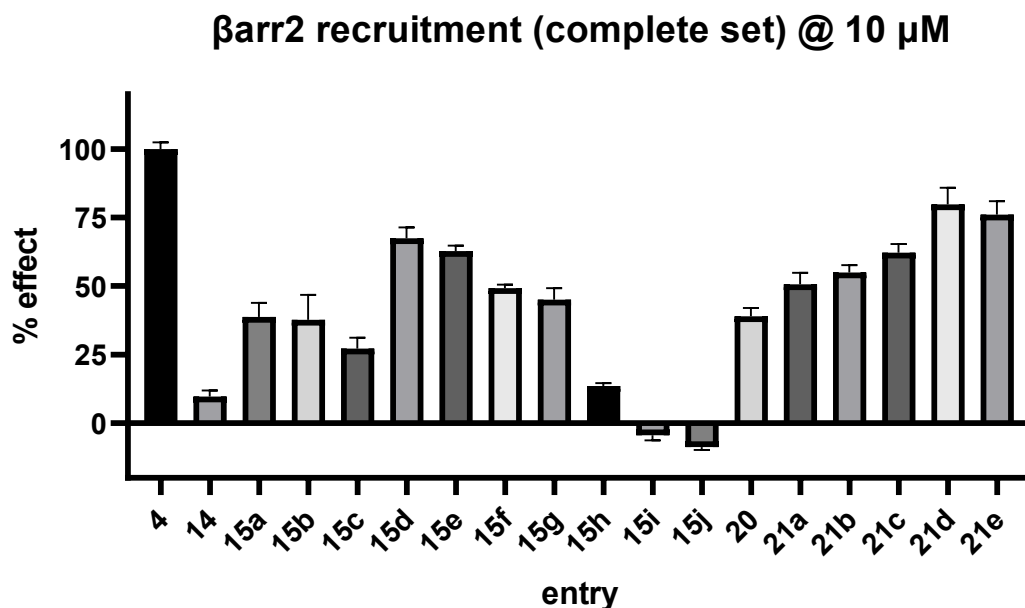

Figure S-3. Functional activity screening of compounds **4**, **14**, **15a-j**, **20** and **21a-e** by NanoBiT® *hCB<sub>2</sub>R*  $\beta$ arr2 recruitment assay. Receptor activation was monitored at 10  $\mu$ M and normalized to the maximum response of compound **4**; n=3.

#### 5. Pharmacokinetic measurements

Table S-2. Plasma concentrations of compound **15d** in male CD-1 mice following IV (2 mg/kg) administration.

| Sample collection<br>time point, min | Plasma concentration (ng/ml) |         |         |             |     |    |
|--------------------------------------|------------------------------|---------|---------|-------------|-----|----|
|                                      | Mouse A                      | Mouse B | Mouse C | Mean        | SD  | SE |
| 0                                    | BQL                          |         |         | <b>BQL</b>  | ND  | ND |
| 5                                    | 1912                         | 1857    | 1645    | <b>1805</b> | 141 | 81 |
| 15                                   | 794                          | 638*    | 791     | <b>793</b>  | 2   | 2  |
| 60                                   | 20                           | 19      | 13      | <b>18</b>   | 4   | 2  |
| 120                                  | 1                            | 1       | BQL     | <b>1</b>    | 1   | 0  |
| 240                                  | BQL                          | BQL     | BQL     | <b>BQL</b>  | ND  | ND |

BQL - Below the lower limit of quantitation (LLOQ)

ND - Not determined

\*Grubbs' outlier test: Significant outlier. P < 0.05

Table S-3. Brain concentrations of compound **15d** in male CD-1 mice following IV (2 mg/kg) administration.

| Sample collection<br>time point, min | Brain concentration (ng/g) |         |         |            |    |    |
|--------------------------------------|----------------------------|---------|---------|------------|----|----|
|                                      | Mouse A                    | Mouse B | Mouse C | Mean       | SD | SE |
| 0                                    | BQL                        |         |         | <b>BQL</b> | ND | ND |
| 5                                    | 178                        | 171     | 232     | <b>194</b> | 33 | 19 |
| 15                                   | 38                         | 30      | 39      | <b>36</b>  | 5  | 3  |
| 60                                   | 1                          | 1       | 1       | <b>1</b>   | 0  | 0  |
| 120                                  | BQL                        | BQL     | BQL     | <b>BQL</b> | ND | ND |
| 240                                  | BQL                        | BQL     | BQL     | <b>BQL</b> | ND | ND |

BQL - Below the lower limit of quantitation (LLOQ)

ND - Not determined

Table S-4. Plasma concentrations of metabolite **14** in male CD-1 mice following IV administration of compound **15d** (2 mg/kg).

| Sample collection<br>time point, min | Plasma concentration (ng/ml) |         |         |            |    |    |
|--------------------------------------|------------------------------|---------|---------|------------|----|----|
|                                      | Mouse A                      | Mouse B | Mouse C | Mean       | SD | SE |
| 0                                    | BQL                          |         |         | <b>BQL</b> | ND | ND |
| 5                                    | 114                          | 109     | 86      | <b>103</b> | 15 | 9  |
| 15                                   | 51                           | 42      | 43      | <b>45</b>  | 5  | 3  |
| 60                                   | 6                            | 4       | 2       | <b>4</b>   | 2  | 1  |
| 120                                  | 2                            | 1       | 1       | <b>1</b>   | 1  | 0  |
| 240                                  | BQL                          | 1*      | BQL     | <b>BQL</b> | ND | ND |

BQL - Below the lower limit of quantitation (LLOQ)

ND - Not determined

\*Grubbs' outlier test: Significant outlier. P < 0.05

Table S-5. Brain concentrations of metabolite **14** in male CD-1 mice following IV administration of compound **15d** (2 mg/kg).

| Sample collection time point, min | Brain concentration (ng/g) |         |         |            |    |    |
|-----------------------------------|----------------------------|---------|---------|------------|----|----|
|                                   | Mouse A                    | Mouse B | Mouse C | Mean       | SD | SE |
| 0                                 | BQL                        |         |         | <b>BQL</b> | ND | ND |
| 5                                 | 3                          | 3       | 3       | <b>3</b>   | 0  | 0  |
| 15                                | 1                          | 1       | 2       | <b>2</b>   | 0  | 0  |
| 60                                | BQL                        | BQL     | BQL     | <b>BQL</b> | ND | ND |
| 120                               | BQL                        | BQL     | BQL     | <b>BQL</b> | ND | ND |
| 240                               | BQL                        | BQL     | BQL     | <b>BQL</b> | ND | ND |

BQL - Below the lower limit of quantitation (LLOQ)

ND - Not determined

Table S-6. Plasma concentrations of compound **21d** in male CD-1 mice following IV administration (2 mg/kg).

| Sample collection time point, min | Plasma concentration (ng/ml) |         |         |            |    |    |
|-----------------------------------|------------------------------|---------|---------|------------|----|----|
|                                   | Mouse A                      | Mouse B | Mouse C | Mean       | SD | SE |
| 0                                 | BQL                          |         |         | <b>BQL</b> | ND | ND |
| 5                                 | 133                          | 117     | 122     | <b>124</b> | 8  | 5  |
| 15                                | 109                          | 89      | 86      | <b>95</b>  | 13 | 7  |
| 60                                | 18                           | 25      | 37      | <b>27</b>  | 10 | 6  |
| 120                               | 7                            | 7       | 6       | <b>7</b>   | 1  | 0  |
| 240                               | 1                            | 1       | 4       | <b>2</b>   | 1  | 1  |

BQL - Below the lower limit of quantitation (LLOQ)

Table S-7. Brain concentrations of compound **21d** in male CD-1 mice following IV administration (2 mg/kg).

| Sample collection time point, min | Brain concentration (ng/g) |         |         |            |    |    |
|-----------------------------------|----------------------------|---------|---------|------------|----|----|
|                                   | Mouse A                    | Mouse B | Mouse C | Mean       | SD | SE |
| 0                                 | BQL                        |         |         | <b>BQL</b> | ND | ND |
| 5                                 | 32                         | 38      | 44      | <b>38</b>  | 6  | 4  |
| 15                                | 18                         | 23      | 21      | <b>21</b>  | 2  | 1  |
| 60                                | 9                          | 8       | 11      | <b>9</b>   | 2  | 1  |
| 120                               | 5                          | 4       | 3       | <b>4</b>   | 1  | 0  |
| 240                               | 2                          | 1       | 2       | <b>2</b>   | 0  | 0  |

BQL - Below the lower limit of quantitation (LLOQ)

ND - Not determined

Table S-8. Plasma concentrations of metabolite **20** in male CD-1 mice following IV administration of compound **21d** (2 mg/kg).

| Sample collection time point, min | Plasma concentration (ng/ml) |         |         |            |    |    |
|-----------------------------------|------------------------------|---------|---------|------------|----|----|
|                                   | Mouse A                      | Mouse B | Mouse C | Mean       | SD | SE |
| 0                                 | BQL                          |         |         | <b>BQL</b> | ND | ND |
| 5                                 | 6                            | 6       | 17      | <b>10</b>  | 7  | 4  |
| 15                                | 7                            | 6       | 7       | <b>6</b>   | 0  | 0  |
| 60                                | 4                            | 4       | 9       | <b>6</b>   | 3  | 2  |
| 120                               | 2                            | 1       | 1       | <b>1</b>   | 1  | 0  |
| 240                               | BQL                          | 1       | 1       | <b>1</b>   | 0  | 0  |

BQL - Below the lower limit of quantitation (LLOQ)

ND - Not determined

Table S-9. Brain concentrations of metabolite **20** in male CD-1 mice following IV administration of compound **21d** (2 mg/kg).

| Sample collection<br>time point, min | Brain concentration (ng/g) |         |         |            |    |    |
|--------------------------------------|----------------------------|---------|---------|------------|----|----|
|                                      | Mouse A                    | Mouse B | Mouse C | Mean       | SD | SE |
| 0                                    | BQL                        |         |         | <b>BQL</b> | ND | ND |
| 5                                    | 7                          | 7       | 14      | <b>9</b>   | 4  | 2  |
| 15                                   | 13                         | 13      | 15      | <b>14</b>  | 1  | 0  |
| 60                                   | 13                         | 14      | 14      | <b>14</b>  | 1  | 0  |
| 120                                  | 6                          | 4       | 3       | <b>4</b>   | 2  | 1  |
| 240                                  | 1                          | 1       | 1       | <b>1</b>   | 0  | 0  |

BQL - Below the lower limit of quantitation (LLOQ)

ND - Not determined



## 6. HPLC chromatograms of target compounds

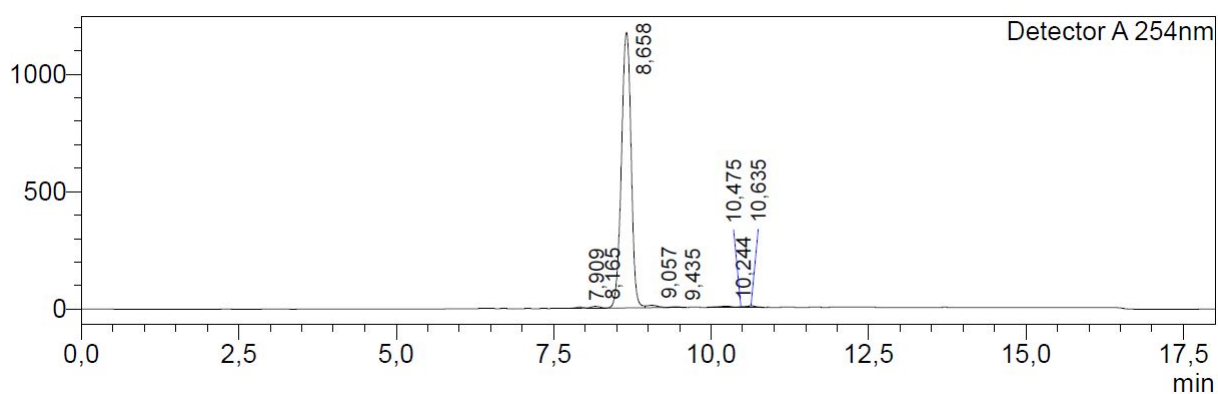

Figure S-4. HPLC chromatogram of **14**.

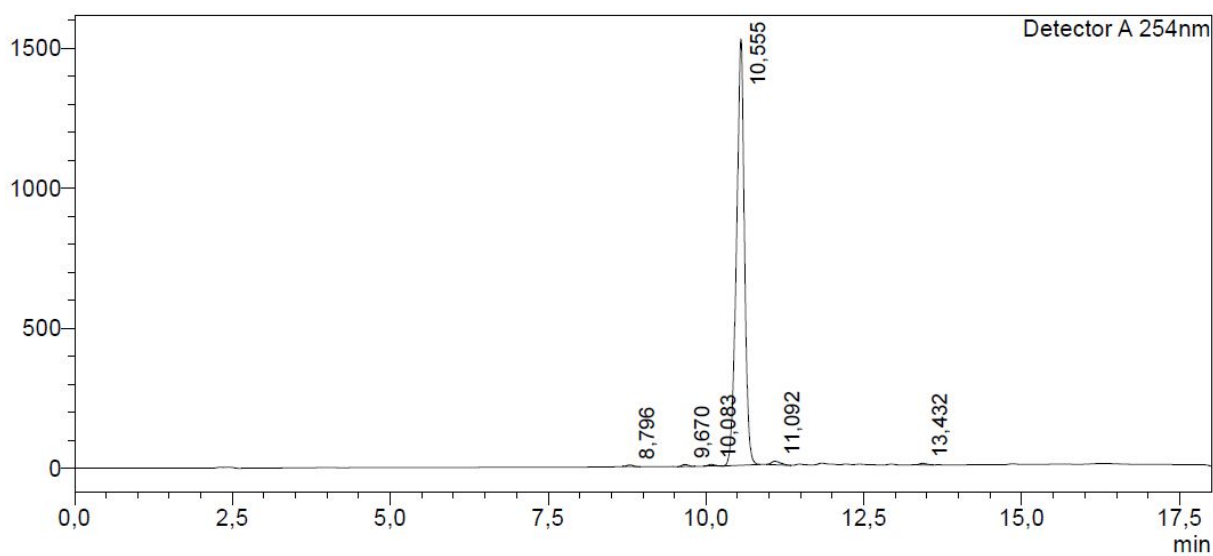

Figure S-5. HPLC chromatogram of **15a**.

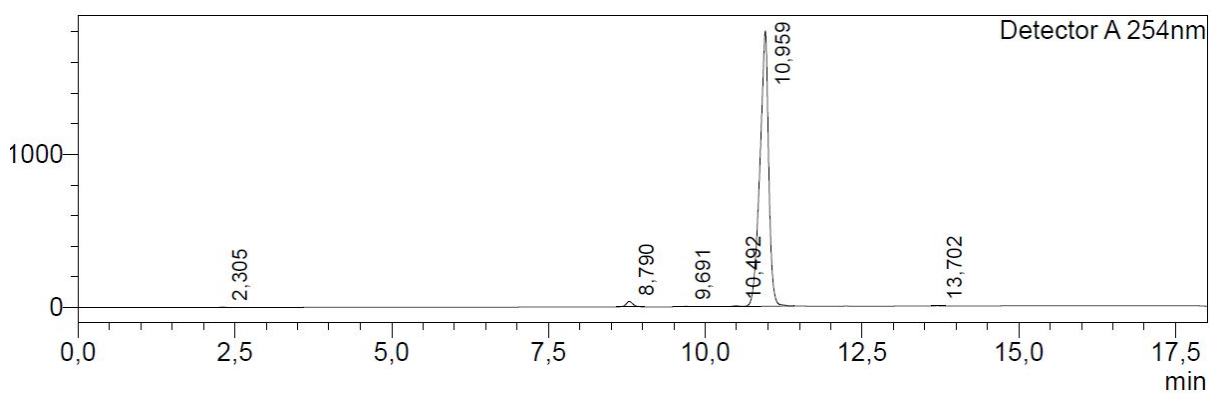

Figure S-6. HPLC chromatogram of **15b**.

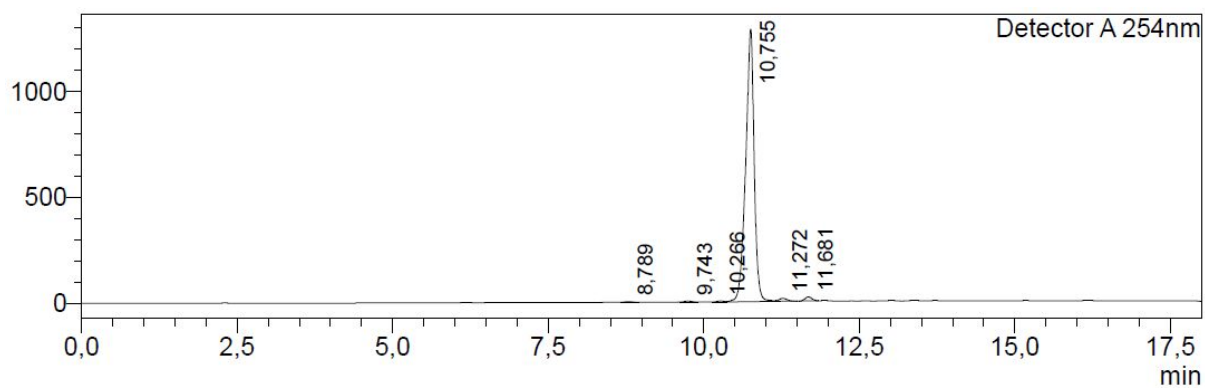

Figure S-7. HPLC chromatogram of **15c**.

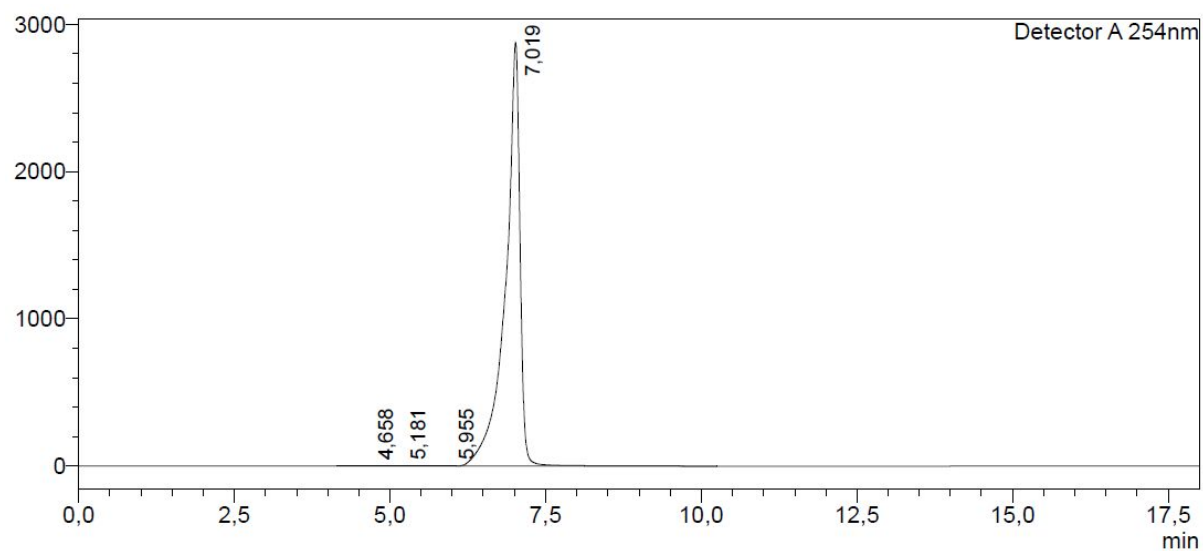

Figure S-8. HPLC chromatogram of **15d**.

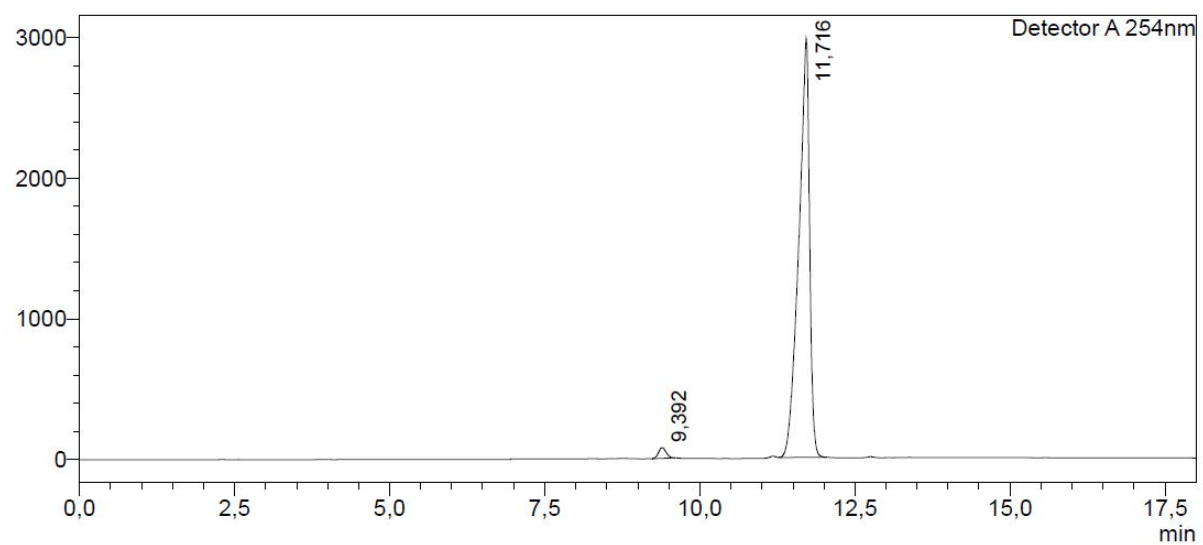

Figure S-9. HPLC chromatogram of **15e**.

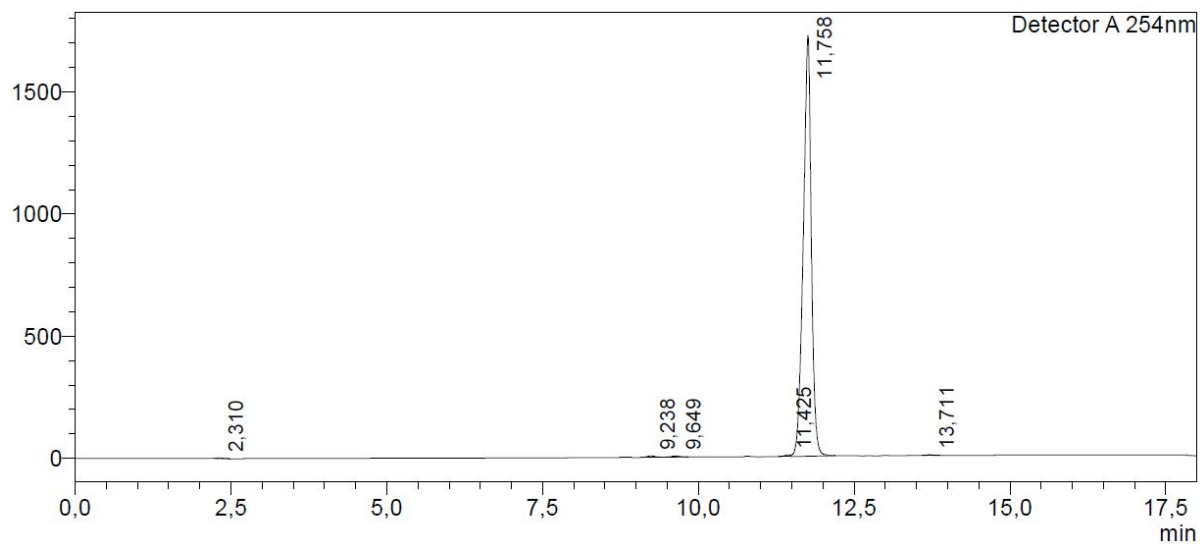

Figure S-10. HPLC chromatogram of **15f**.

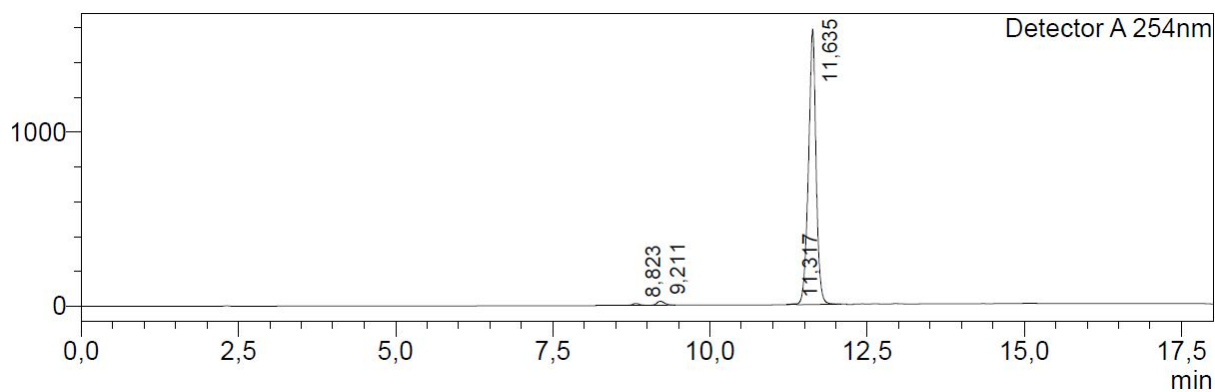

Figure S-11. HPLC chromatogram of **15g**.

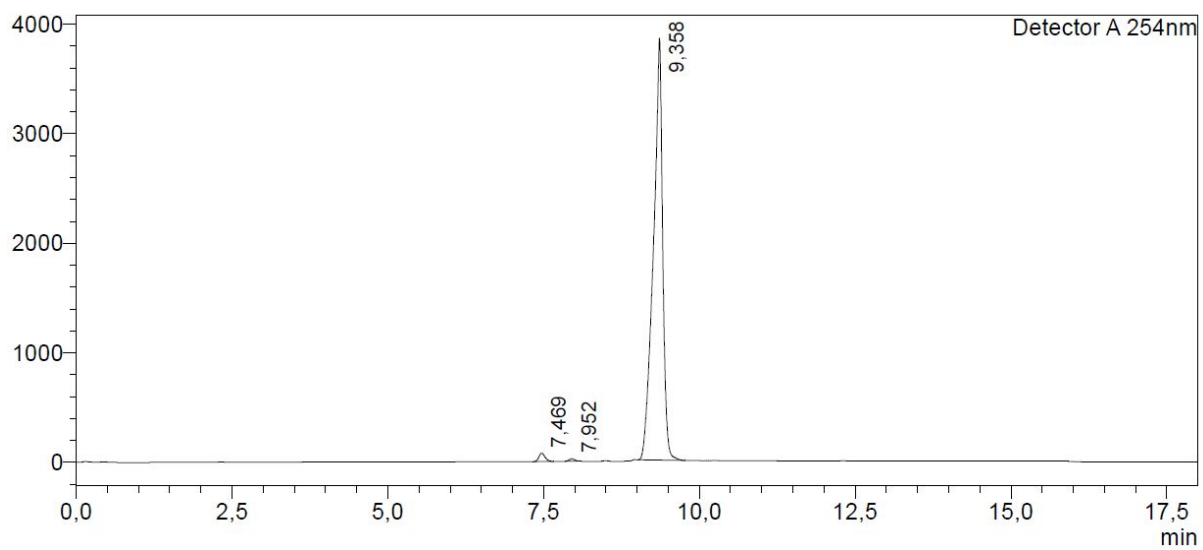

Figure S-12. HPLC chromatogram of **15h**.

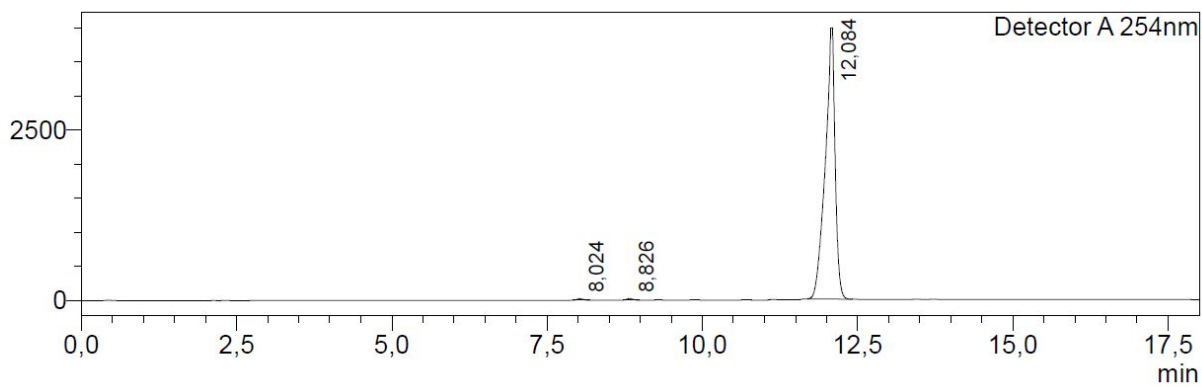

Figure S-13. HPLC chromatogram of **15i**.

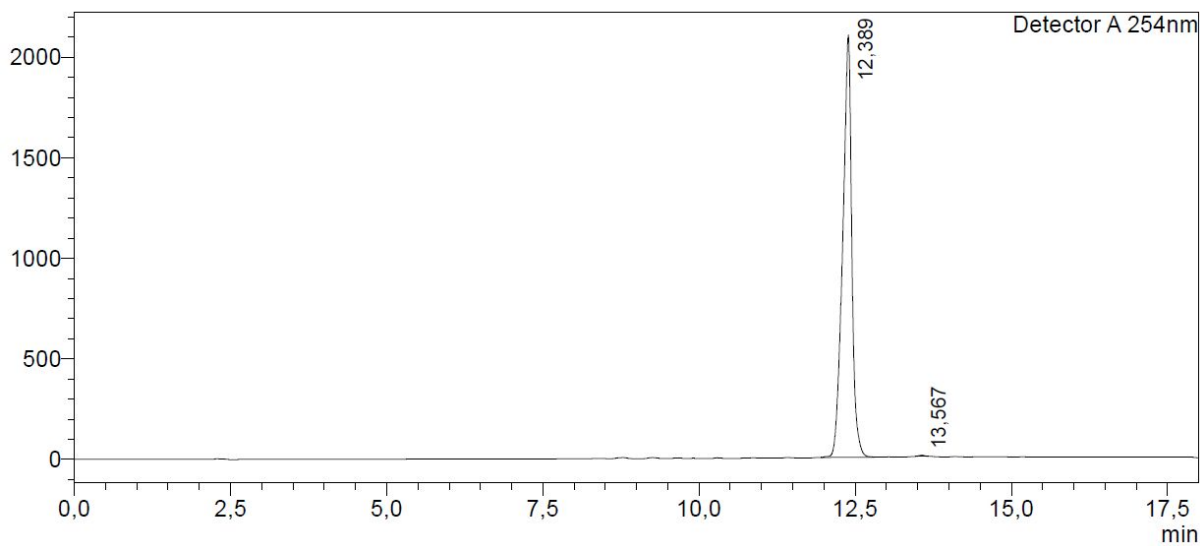

Figure S-14. HPLC chromatogram of **15j**.

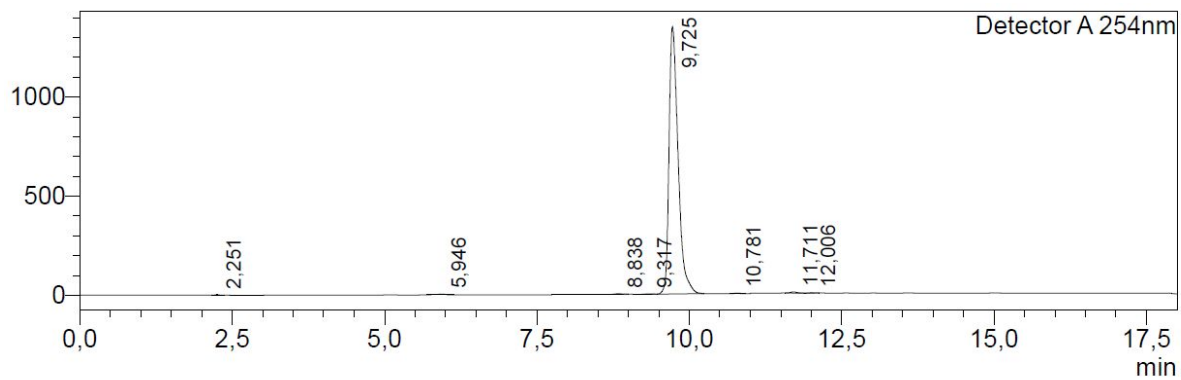

Figure S-15. HPLC chromatogram of **20**.

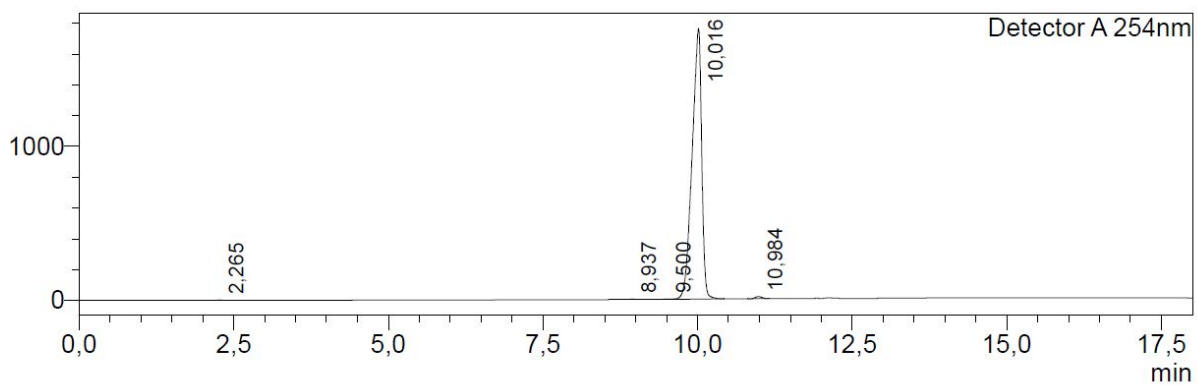

Figure S-16. HPLC chromatogram of **21a**.

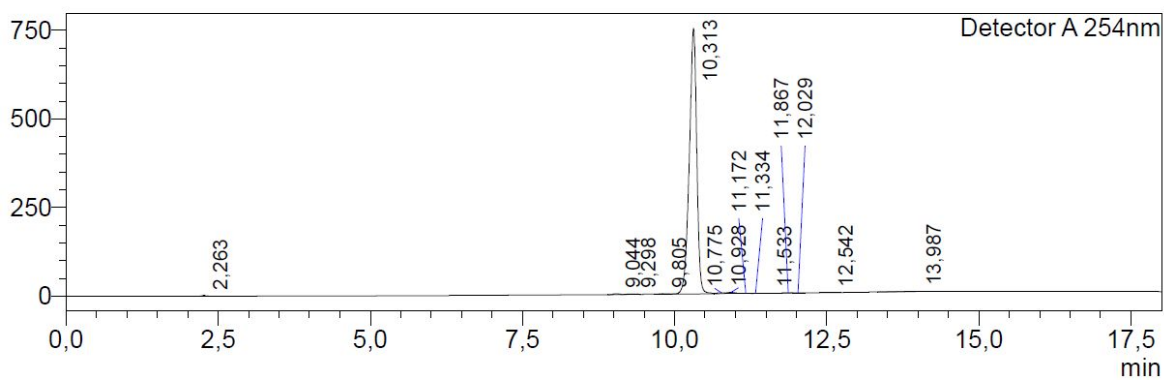

Figure S-17. HPLC chromatogram of **21b**.

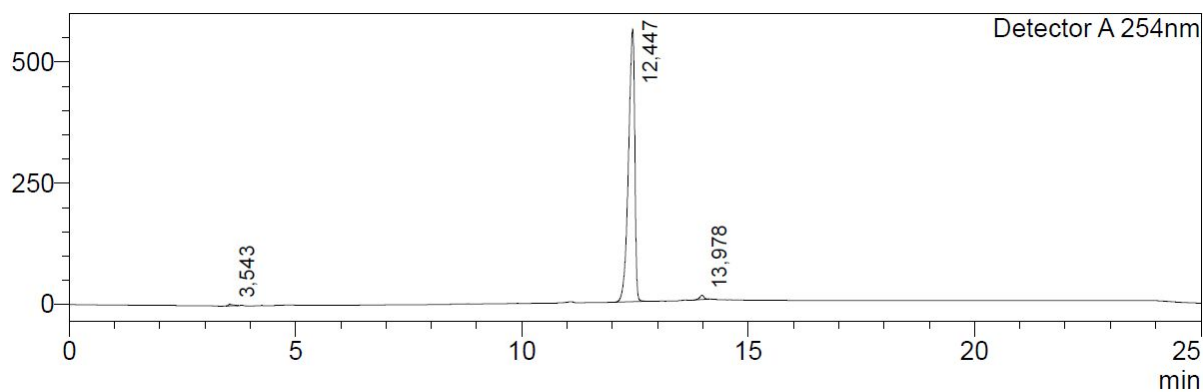

Figure S-18. HPLC chromatogram of **21c**.

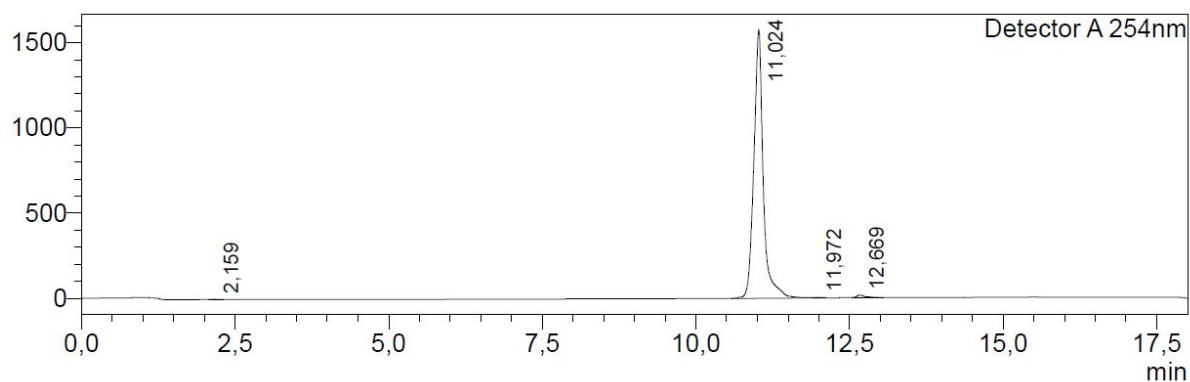

Figure S-19. HPLC chromatogram of **21d**.

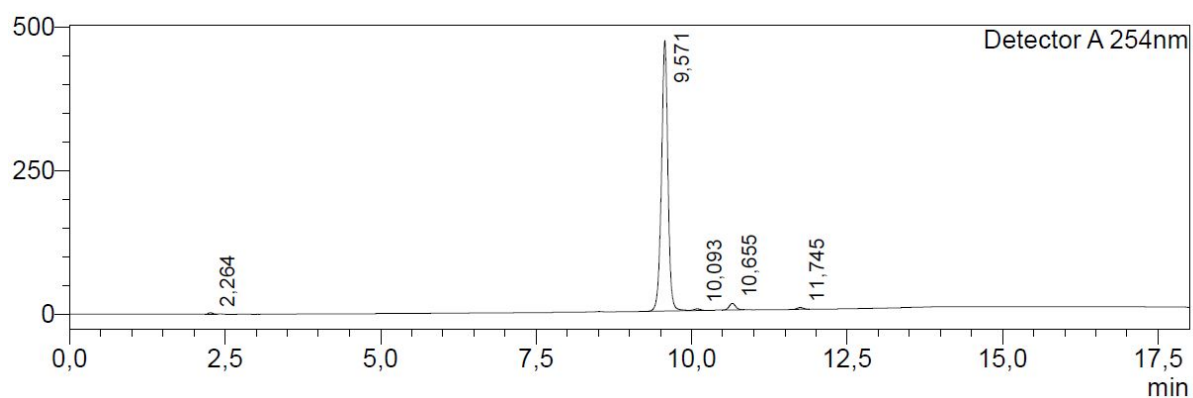

Figure S-20. HPLC chromatogram of **21e**.

## 7. Melting point measurement

Melting point were measured with OptiMelt MPA 100, an automated meltingpoint system from Stanford Research Systems. The device records a sigmoidal melting curve, wherein the inflection point is reported as the melting point.
